# Supplementary material
Source: Royal Society of Chemistry journal article supplement (doi:10.1039/d6ma00229c)
Supplement: d6ma00229c1.pdf [file d6ma00229c1.pdf]

## Supporting Information

### **Bridging Energy Conversion and Storage: Precursor-Engineered Co@CoO-Y<sub>2</sub>O<sub>3</sub> Heterostructures for Oxygen Reduction Reaction and Battery-Type Supercapacitor Applications**

Sukhendu Bikash Samanta,<sup>a#</sup> Soumalya Roy,<sup>b#</sup> Sudipta Palit,<sup>a</sup> Joshi Ankitkumar Bharatbhai,<sup>a</sup>  
Nishipadma Barik,<sup>c</sup> Himchan Mo,<sup>b</sup> Junseong Lee,<sup>b\*</sup> Soumen Giri,<sup>c,d,e\*</sup> Sourav Das<sup>a\*</sup>

[a] Department of Basic Sciences, Chemistry Discipline, Institute of Infrastructure  
Technology, Research And Management (IITRAM), Ahmedabad, Gujarat, India

[b] Department of Chemistry, Chonnam National University, 77 Yongbong-ro, Buk-gu,  
Gwangju 61186, Korea

[c] School of Applied Sciences, Kalinga Institute of Industrial Technology (KIIT) Deemed to  
be University, Bhubaneswar-751024, Odisha, India

[d] Centre of Innovation and Research- Electrical Vehicle (COIR-EV), KIIT Deemed to be  
University, Bhubaneswar 751024, Odisha, India

[e] Centre of Innovation and Research- Next-Generation Materials and Technology (COIR-  
CNGMT), KIIT Deemed to be University, Bhubaneswar 751024, Odisha, India.

# These authors contributed equally to this work.

## Table of Contents

| Table/Figure No. | Name                                                                                                                                                                                                                                                                                                                                                                                           | Page No. |
|------------------|------------------------------------------------------------------------------------------------------------------------------------------------------------------------------------------------------------------------------------------------------------------------------------------------------------------------------------------------------------------------------------------------|----------|
| <b>Fig. S1.</b>  | The post cycling XPS survey analysis of the sample                                                                                                                                                                                                                                                                                                                                             | S3       |
| <b>Equation</b>  | <b>The <i>SCHERRER</i> formula</b>                                                                                                                                                                                                                                                                                                                                                             | S3       |
| <b>Fig. S2.</b>  | Diameter vs pore volume curve                                                                                                                                                                                                                                                                                                                                                                  | S4       |
| <b>Fig. S3.</b>  | (a-e) EDX elemental mapping of elements present in catalyst sample, (f) EDX spectrum as obtained from analysis.                                                                                                                                                                                                                                                                                | S4       |
| <b>Fig. S4.</b>  | CV of CCY at O <sub>2</sub> -saturated electrolyte                                                                                                                                                                                                                                                                                                                                             | S5       |
| <b>Fig. S5.</b>  | Stability test (Time vs Current plot) of CCY sample                                                                                                                                                                                                                                                                                                                                            | S5       |
| <b>Table S1.</b> | Table S1. Different Cobalt oxide-based ORR catalysts                                                                                                                                                                                                                                                                                                                                           | S6       |
| <b>Fig. S6.</b>  | For the selection of potential window from 0-0.55V and the current response is not linear above the 0-0.55 V (a-b), (c) The GCD response of CCY in KOH at different constant current, (d) The Fitted EIS plot for 1 <sup>st</sup> GCD cycle and after 10000 GCD cycles, (e) ECSA calculation the non-faradic zone, (f) the Cdl calculation and linear fit of the current change with scan rate | S6       |
| <b>Fig. S7.</b>  | (a-c) The various circuit diagram used to fit the EIS spectra, (d) Comparison of bode plot as investigated in different electrolytes.                                                                                                                                                                                                                                                          | S7       |

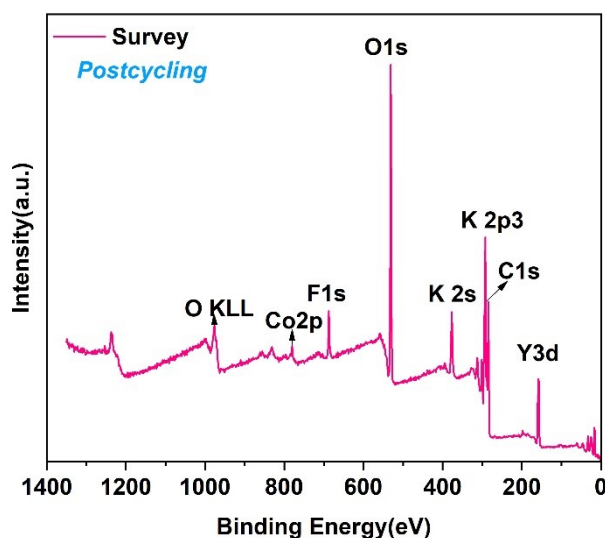

**Fig. S1.** The post cycling XPS survey analysis of the sample, the new peaks for K (appeared from KOH), F (from PVDF).

**The SCHERRER formula:**

The average crystallite size was calculated using the Scherrer equation:

$$\text{Crystallite size (D)} = K \times \lambda / (\beta_{\text{size}} \times \cos \theta)$$

where D is the average crystallite size, K is the shape factor (typically taken as 0.9),  $\lambda$  is the X-ray wavelength,  $\theta$  is the Bragg diffraction angle, and  $\beta_{\text{size}}$  is the peak broadening related to crystallite size.

The mean lattice strain (lattice distortion) was determined using the tangent formula:

$$\text{Lattice strain } (\varepsilon) = \beta_{\text{strain}} / (4 \times \tan \theta)$$

where  $\varepsilon$  represents the lattice strain, and  $\beta_{\text{strain}}$  corresponds to the strain-induced peak broadening.

The structural broadening ( $\beta$ ) was obtained by correcting the observed peak broadening for instrumental effects using a standard reference sample. The size-related and strain-related broadening were calculated using the following relations:

$$\beta_{\text{size}} = \beta_{\text{obs}} - \beta_{\text{std}}$$

$$\beta_{\text{strain}} = \text{square root of } (\beta_{\text{obs}}^2 - \beta_{\text{std}}^2)$$

where  $\beta_{\text{obs}}$  is the integral breadth of the diffraction peak of the sample and  $\beta_{\text{std}}$  is the instrumental broadening obtained from the standard material.<sup>S1</sup>

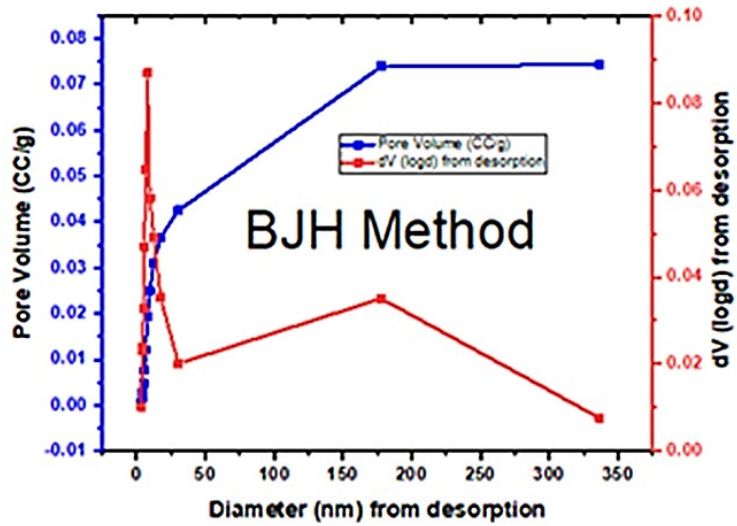

Fig. S2. Diameter vs pore volume curve

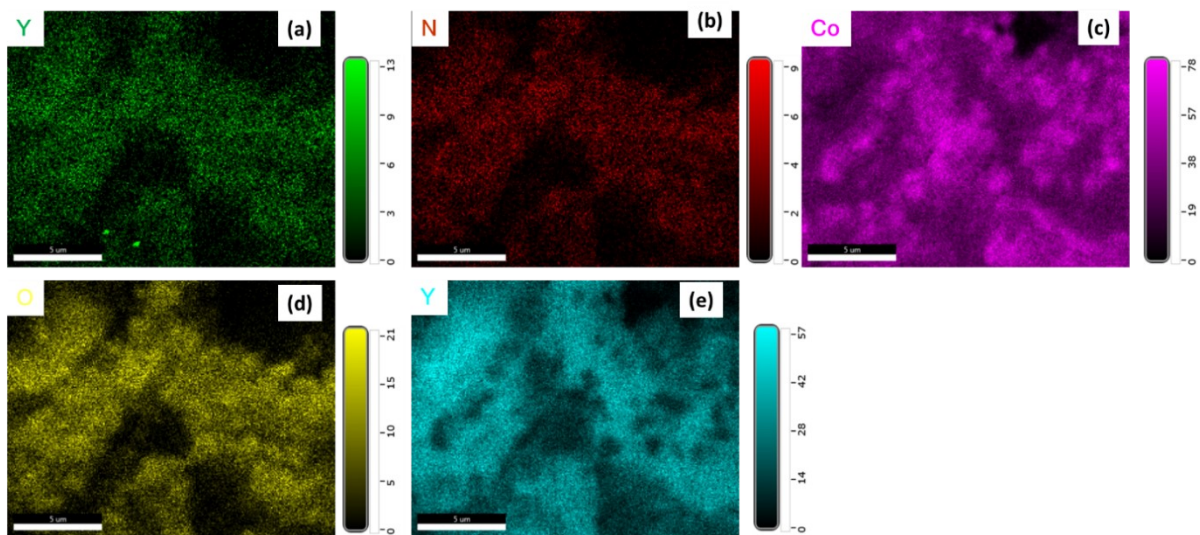

06-12-2025 | S1 | Area 1 | Live Map 1

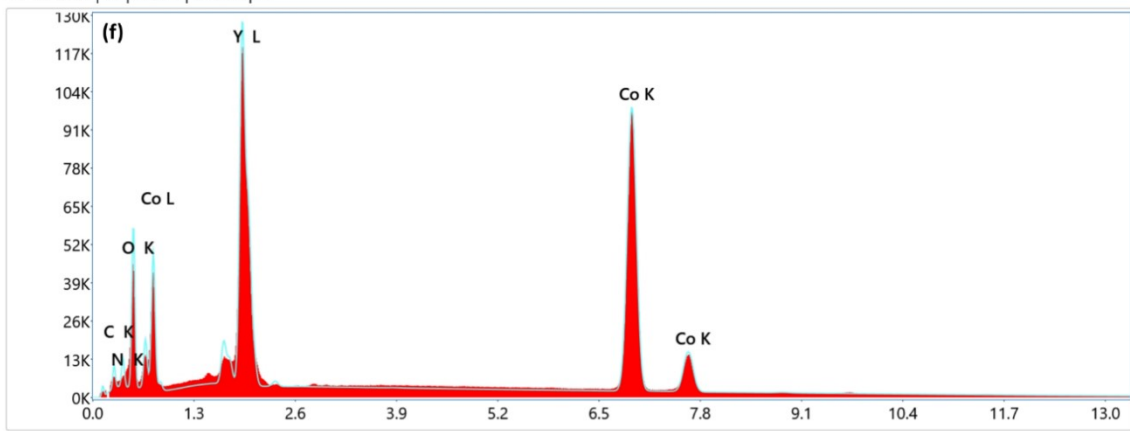

Fig.S3. (a-e) EDX elemental mapping of elements present in catalyst sample, (f) EDX spectrum as obtained from analysis.

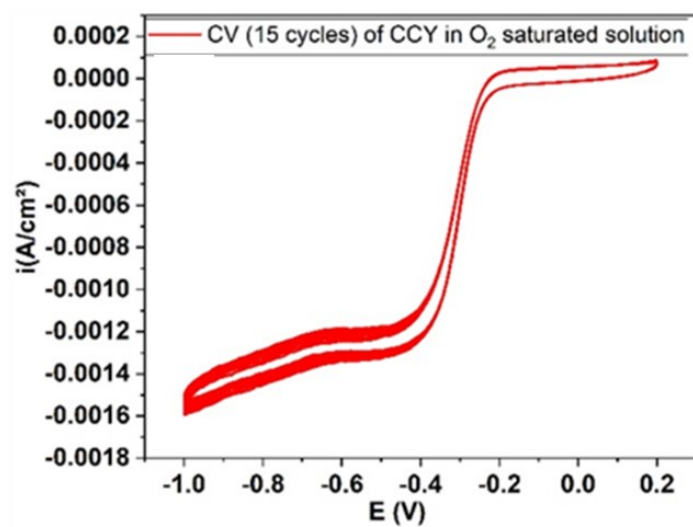

Fig. S4. CV of CCY at O<sub>2</sub>-saturated electrolyte

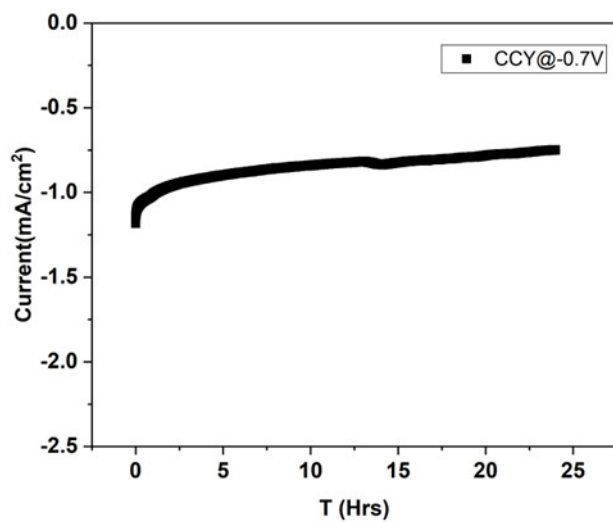

Fig. S5: Stability test (Time vs Current plot) of CCY sample.

**Table S1. Different Cobalt oxide-based ORR catalysts**

| Catalyst                                                    | Onset Potential (V) | Half-wave Potential (V) | Electrolyte | Reference |
|-------------------------------------------------------------|---------------------|-------------------------|-------------|-----------|
| <b>Co@CoO/Y<sub>2</sub>O<sub>3</sub> (This work)</b>        | <b>0.602</b>        | <b>0.728</b>            | 1 M KOH     | This work |
| Co-CoO@NC/NC                                                | 0.961               | 0.868                   | 0.1 M KOH   | S2        |
| Co/Co <sub>3</sub> O <sub>4</sub> @N-doped carbon           | 0.94                | 0.85                    | 0.1 M KOH   | S3        |
| CoO/CoFe <sub>2</sub> O <sub>4</sub> /N-doped porous carbon | 0.934               | 0.865                   | 0.1 M KOH   | S4        |
| Co@C NPs-2h                                                 | 0.99                | 0.76                    | 0.1 M KOH   | S5        |

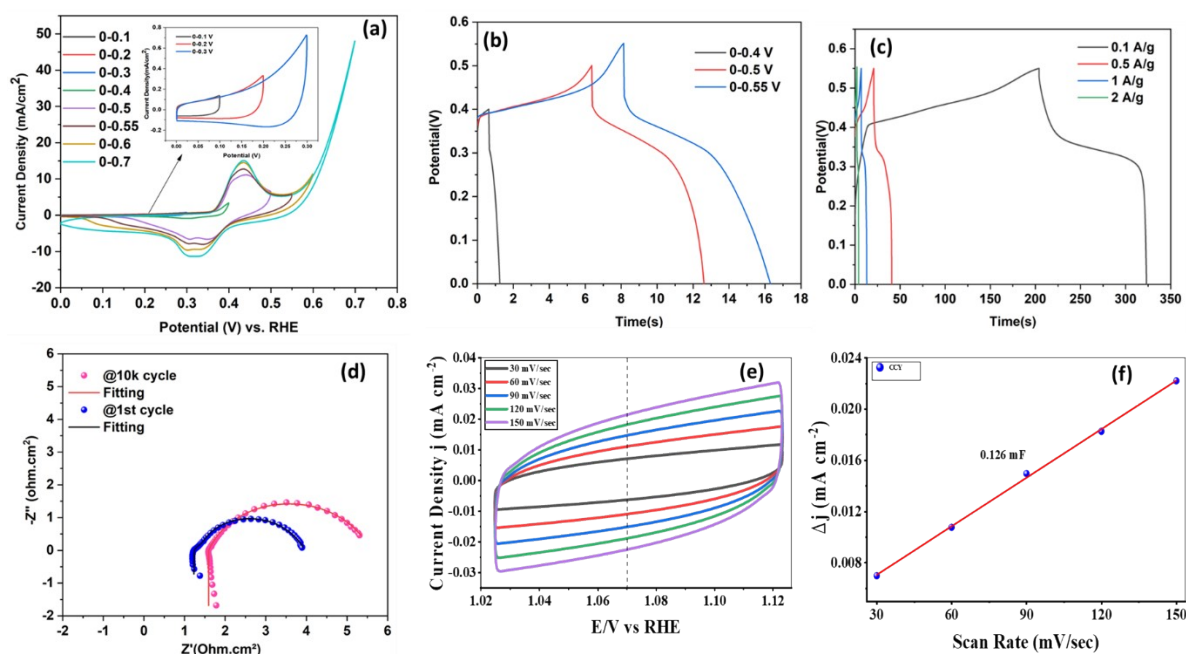

**Fig. S6.** For the selection of potential window from 0-0.55V and the current response is not linear above the 0-0.55 V (a-b), (c) The GCD response of CCY in KOH at different constant current, (d) The Fitted EIS plot for 1<sup>st</sup> GCD cycle and after 10000 GCD cycles, (e) ECSA calculation the non-faradic zone, (f) the  $C_{dl}$  calculation and linear fit of the current change with scan rate.

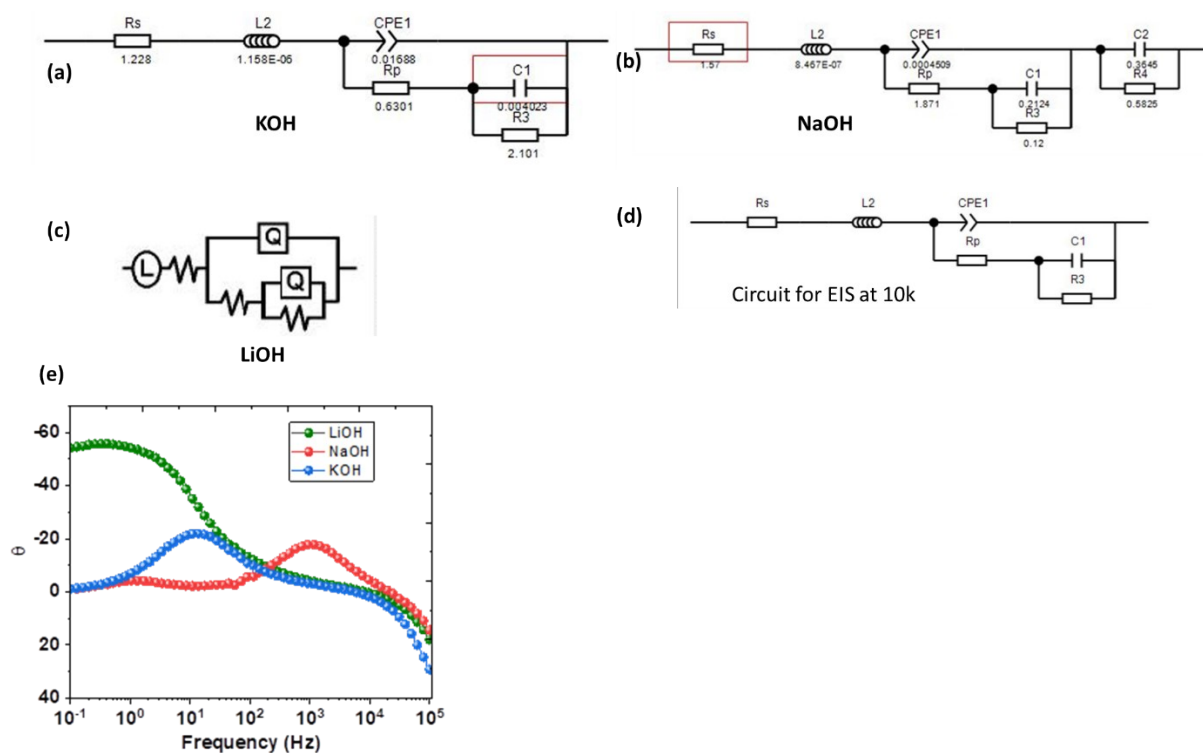

**Fig. S7. (a-d) The various circuit diagram used to fit the EIS spectra, (d) Comparison of bode plot as investigated in different electrolytes.**

#### Reference:

- S1. P. Scherrer, *Nachr. Ges. Wiss. Göttingen*, 1918, **2**, 96–100.
- S2. Z. Zhen, Z. Jiang, X. Tian, L. Zhou, B. Deng, B. Chen and Z.-J. Jiang, *RSC Adv.*, 2018, **8**, 14462–14472.
- S3. Y. Wu, Y. Wang, Z. Xiao, M. Li, Y. Ding and M.-l. Qi, *RSC Adv.*, 2021, **11**, 2693–2700.
- S4. X. Jin, Y. Jiang, Q. Hu, S. Zhang, Q. Jiang, L. Chen, L. Xu, Y. Xie and J. Huang, *RSC Adv.*, 2017, **7**, 56375–56381.
- S5. S. Li, W. Miao, E. Lv, X. Cao, X. Li, X. Zhang, H. Yu and X. Dong, *ChemistrySelect*, 2022, **7**, e202201823.
